# Supplementary material for: Genetic Fine-Mapping With Dense Linkage Disequilibrium Blocks
Source: Research Square preprint supplement (doi:10.21203/rs.3.rs-649530/v1), 2021-08-24
Supplement: Supplementary file 1 [file ae8b319a6da5f86ef6fe23a7.xlsx]

## Sheet: Formatted
Dense-LD results				GWAS results							FAVOR
Block ID	Dense-LD rank	rsID	Positions (GRch37)	SNP name with minor allele from our analysis	BETA (SE)	T	P	neglog10P	Gene(NCBI, GWAScatalog)	Gene(Combine NCBI, GWAScatalog, FAVOR)	Variant	Positions (GRch38)	TOPMed QC Status	TOPMed Depth	TOPMed Bravo AF	Gencode Comprehensive Category	Gencode Comprehensive Info	UCSC Info	Disruptive Missense	RefSeq Info	CAGE Promoter	CAGE Enhancer	GeneHancer	SuperEnhancer
18	852	rs72736802	78719501	rs72736802_T	0.7913(0.0391)	20.25	5.308e-91	90.2751	NoInfo	CRABP1-IREB2	chr15-78427159-A-T	78427159	PASS	41.99	0.391421	intergenic	CRABP1(dist=78934),IREB2(dist=10272)	ENST00000558606.2(dist=44004),ENST00000560840.5(dist=10272)	NO	CRABP1(dist=78934),IREB2(dist=10272)	NO	NO	NO	NO
18	853	rs72738704	78719832	rs72738704_C	0.8637(0.0393)	21.98	6.537e-107	106.185	NoInfo	CRABP1-IREB2	chr15-78427490-G-C	78427490	PASS	40.14	0.222254	intergenic	CRABP1(dist=79265),IREB2(dist=9941)	ENST00000558606.2(dist=44335),ENST00000560840.5(dist=9941)	NO	CRABP1(dist=79265),IREB2(dist=9941)	NO	NO	NO	NO
18	854	rs951984	78720915	rs951984_A	0.7515(0.041)	18.35	4.373e-75	74.3592	IREB2	CRABP1-IREB2	chr15-78428573-T-A	78428573	SVM;EXHET	43.16	0.178947	intergenic	CRABP1(dist=80348),IREB2(dist=8858)	ENST00000558606.2(dist=45418),ENST00000560840.5(dist=8858)	NO	CRABP1(dist=80348),IREB2(dist=8858)	NO	NO	NO	NO
18	855	rs951985	78720923	rs951985_G	0.8656(0.0393)	22.03	2.085e-107	106.681	IREB2	CRABP1-IREB2	chr15-78428581-T-G	78428581	SVM	43.24	0.20897	intergenic	CRABP1(dist=80356),IREB2(dist=8850)	ENST00000558606.2(dist=45426),ENST00000560840.5(dist=8850)	NO	CRABP1(dist=80356),IREB2(dist=8850)	NO	NO	NO	NO
18	856	rs1394371	78724469	rs1394371_T	0.7578(0.0409)	18.55	9.745e-77	76.0112	NoInfo	CRABP1-IREB2	chr15-78432127-C-T	78432127	PASS	39.8	0.209759	intergenic	CRABP1(dist=83902),IREB2(dist=5304)	ENST00000558606.2(dist=48972),ENST00000560840.5(dist=5304)	NO	CRABP1(dist=83902),IREB2(dist=5304)	NO	NO	NO	NO
18	857	rs17483548	78730313	rs17483548_A	0.8759(0.0392)	22.34	2.377e-110	109.624	IREB2	IREB2	chr15-78437971-G-A	78437971	PASS	41.13	0.222031	intronic	IREB2	ENST00000560840.5	NO	IREB2	NO	NO	YES	YES
18	858	rs17405217	78731149	rs17405217_T	0.876(0.0392)	22.34	2.237e-110	109.65	IREB2	IREB2	chr15-78438807-C-G	78438807	SVM	37.43	7.96381e-06	intronic	IREB2	ENST00000560454.1	NO	IREB2(NM_001320942:c.-24180C>G)	NO	NO	YES	YES
18	859	rs17483686	78733390	rs17483686_T	0.8656(0.0391)	22.14	2.017e-108	107.695	IREB2	IREB2	chr15-78441048-A-T	78441048	PASS	40.08	0.288632	intronic	IREB2	ENST00000560454.1	NO	IREB2	NO	NO	NO	YES
18	860	rs17483721	78733731	rs17483721_C	0.8649(0.0391)	22.11	3.71e-108	107.431	IREB2	IREB2	chr15-78441389-T-C	78441389	PASS	40.17	0.28872	intronic	IREB2	ENST00000560454.1	NO	IREB2	NO	NO	NO	YES
18	861	rs4887056	78734585	rs4887056_G	0.8659(0.0391)	22.13	2.538e-108	107.596	IREB2	IREB2	chr15-78442243-A-G	78442243	PASS	38.78	0.28872	intronic	IREB2	ENST00000560454.1	NO	IREB2	NO	NO	NO	YES
18	863	rs55983731	78735269	rs55983731_T	0.8661(0.0391)	22.15	1.512e-108	107.82	IREB2	IREB2	chr15-78442927-C-T	78442927	PASS	37.02	0.288425	intronic	IREB2	ENST00000560454.1	NO	IREB2	NO	NO	NO	YES
18	864	rs72738718	78735438	rs72738718_C	0.8659(0.0391)	22.15	1.73e-108	107.762	IREB2	IREB2	chr15-78443096-G-C	78443096	PASS	38.87	0.288728	intronic	IREB2	ENST00000560454.1	NO	IREB2	NO	NO	NO	YES
18	865	rs2089162	78739763	rs2089162_G	0.8769(0.0392)	22.38	9.96e-111	110.002	IREB2	IREB2	chr15-78447421-A-G	78447421	PASS	34.67	0.220956	intronic	IREB2	ENST00000560454.1	NO	IREB2	NO	NO	NO	YES
18	866	rs2938670	78740688	rs2938670_G	0.8596(0.0391)	22.01	3.43e-107	106.465	IREB2	IREB2	chr15-78448346-T-G	78448346	PASS	37.89	0.359964	intronic	IREB2	ENST00000560454.1	NO	IREB2	NO	NO	YES	YES
18	867	rs2656052	78740932	rs2656052_C	0.8596(0.0391)	22.01	3.547e-107	106.45	IREB2	IREB2	chr15-78448590-A-C	78448590	PASS	41.23	0.359964	intronic	IREB2	ENST00000560454.1	NO	IREB2	NO	NO	YES	YES
18	868	rs2568494	78740964	rs2568494_A	0.8596(0.0391)	22.01	3.547e-107	106.45	IREB2	IREB2	chr15-78448622-G-A	78448622	PASS	39.18	0.359901	intronic	IREB2	ENST00000560454.1	NO	IREB2	NO	NO	YES	YES
18	869	rs7181486	78741618	rs7181486_C	0.8659(0.0391)	22.16	1.265e-108	107.898	IREB2	IREB2	chr15-78449276-T-C	78449276	PASS	39.29	0.289341	intronic	IREB2	ENST00000560454.1	NO	IREB2	NO	NO	YES	YES
18	870	rs17483929	78742376	rs17483929_A	0.8654(0.0391)	22.15	1.688e-108	107.773	IREB2	IREB2	chr15-78450034-G-A	78450034	PASS	39.22	0.289078	intronic	IREB2	ENST00000560454.1	NO	IREB2	NO	NO	YES	YES
18	871	rs56219465	78742579	rs56219465_G	0.8657(0.0391)	22.15	1.445e-108	107.84	IREB2	IREB2	chr15-78450237-A-G	78450237	PASS	40.31	0.289325	intronic	IREB2	ENST00000560454.1	NO	IREB2	NO	NO	YES	YES
18	872	rs2656065	78750549	rs2656065_A	0.8572(0.039)	21.95	1.18e-106	105.928	IREB2	IREB2	chr15-78458207-G-A	78458207	PASS	37.6	0.397378	intronic	IREB2	ENST00000560454.1	NO	IREB2	NO	NO	NO	YES
18	873	rs146013239	78751682	rs146013239_GT	0.8713(0.0392)	22.21	4.454e-109	108.351	NoInfo	IREB2	chr15-78459340-G-GT	78459340	PASS	38.97	0.218352	intronic	IREB2	ENST00000560454.1	NO	IREB2	NO	NO	NO	YES
18	874	rs72738732	78752188	rs72738732_G	0.8771(0.0392)	22.39	8.058e-111	110.094	IREB2	IREB2	chr15-78459846-C-A	78459846	SVM	37.64	7.96381e-06	intronic	IREB2	ENST00000560454.1	NO	IREB2	NO	NO	NO	YES
18	875	rs2009746	78754102	rs2009746_G	0.8604(0.0391)	22.03	2.027e-107	106.693	IREB2	IREB2	chr15-78461760-A-G	78461760	PASS	38.11	0.283344	intronic	IREB2	ENST00000560454.1	NO	IREB2	NO	NO	YES	YES
18	876	rs17484235	78761414	rs17484235_G	0.8765(0.0392)	22.38	8.903e-111	110.05	IREB2	IREB2	chr15-78469072-C-A	78469072	SVM	39.31	2.38914e-05	intronic	IREB2	ENST00000559427.1	NO	IREB2	NO	NO	NO	NO
18	877	rs72738736	78765122	rs72738736_T	0.8659(0.0391)	22.17	1.074e-108	107.969	IREB2	IREB2	chr15-78472780-G-T	78472780	PASS	38.5	0.288832	intronic	IREB2	ENST00000258886.12,ENST00000558570.5,ENST00000560440.5	NO	IREB2	NO	NO	NO	NO
18	878	rs1504550	78766250	rs1504550_G	0.8733(0.0392)	22.27	1.097e-109	108.96	IREB2	IREB2	chr15-78473908-A-G	78473908	PASS	40.18	0.219921	UTR3	IREB2(ENST00000560440.5:c.*518A>G)	ENST00000560440.5(ENST00000560440.5:c.*518A>G)	NO	IREB2(NM_001320943:c.*518A>G)	NO	NO	NO	NO
18	879	rs17484524	78772676	rs17484524_G	0.8776(0.0392)	22.42	4.319e-111	110.365	IREB2	IREB2	chr15-78480334-A-G	78480334	PASS	39.68	0.221354	ncRNA_intronic	AC027228.1	ENST00000560094.1	NO	IREB2	NO	NO	NO	NO
18	880	rs11852372	78801394	rs11852372_C	0.9639(0.0391)	24.63	1.042e-133	132.982	HYKK	HYKK	chr15-78509052-A-C	78509052	PASS	36.71	0.261245	intronic	HYKK	ENST00000388988.8,ENST00000408962.6,ENST00000566289.5,ENST00000566332.5	NO	HYKK	NO	NO	NO	NO
18	881	rs9788721	78802869	rs9788721_C	0.9402(0.0387)	24.31	2.766e-130	129.558	HYKK	HYKK	chr15-78510527-C-T	78510527	PASS	35.99	0.651081	intronic	HYKK	ENST00000388988.8,ENST00000408962.6,ENST00000566289.5,ENST00000566332.5	NO	HYKK	NO	NO	NO	NO
18	883	rs8034191	78806023	rs8034191_C	0.9607(0.0388)	24.74	7.811e-135	134.107	HYKK	HYKK	chr15-78513681-T-C	78513681	PASS	39.74	0.260998	intronic	HYKK	ENST00000388988.8,ENST00000408962.6,ENST00000563233.2,ENST00000566289.5,ENST00000566332.5,ENST00000569878.5	NO	HYKK	NO	NO	NO	NO
18	884	rs10519203	78814046	rs10519203_G	0.9562(0.0388)	24.66	5.514e-134	133.259	HYKK	HYKK	chr15-78521704-G-A	78521704	PASS	35.63	0.683311	intronic	HYKK	ENST00000388988.8,ENST00000408962.6,ENST00000563233.2,ENST00000566289.5,ENST00000566332.5,ENST00000569878.5	NO	HYKK	NO	NO	NO	NO
18	885	rs8031948	78816057	rs8031948_T	0.9596(0.0389)	24.7	2.014e-134	133.696	HYKK	HYKK	chr15-78523715-G-T	78523715	PASS	40.57	0.25888	intronic	HYKK	ENST00000388988.8,ENST00000408962.6,ENST00000563233.2,ENST00000566289.5,ENST00000566332.5,ENST00000569878.5	NO	HYKK	NO	NO	NO	NO
18	886	rs8042849	78817929	rs8042849_C	0.9443(0.0387)	24.43	1.418e-131	130.848	HYKK	HYKK	chr15-78525587-C-T	78525587	PASS	39.57	0.6505	intronic	HYKK	ENST00000388988.8,ENST00000408962.6,ENST00000563233.2,ENST00000566289.5,ENST00000566332.5,ENST00000569878.5	NO	HYKK	NO	NO	NO	NO
18	887	rs931794	78826180	rs931794_G	0.9528(0.0388)	24.58	3.955e-133	132.403	HYKK	HYKK	chr15-78533838-G-A	78533838	PASS	38.45	0.690407	UTR3	HYKK(ENST00000388988.9:c.*168G>A,ENST00000569878.5:c.*168G>A)	ENST00000569878.5(ENST00000569878.5:c.*168G>A)	NO	HYKK(NM_001013619:c.*168G>A)	NO	NO	NO	NO
18	888	rs72738786	78828086	rs72738786_T	0.9615(0.0388)	24.77	3.839e-135	134.416	HYKK	HYKK	chr15-78535744-G-T	78535744	PASS	37.81	0.250669	UTR3	HYKK(ENST00000388988.9:c.*2074G>T,ENST00000569878.5:c.*2074G>T)	ENST00000569878.5(ENST00000569878.5:c.*2074G>T)	NO	HYKK(NM_001013619:c.*2074G>T)	NO	NO	NO	NO
18	889	rs56117933	78832349	rs56117933_C	0.7932(0.0466)	17.03	5.319e-65	64.2742	PSMA4	PSMA4	chr15-78540007-T-C	78540007	PASS	38.74	0.144352	upstream	PSMA4	ENST00000044462.11,ENST00000413382.6,ENST00000557929.5,ENST00000558281.5,ENST00000558341.5,ENST00000558635.1,ENST00000558639.5,ENST00000559082.5,ENST00000559146.5,ENST00000559365.5,ENST00000559437.5,ENST00000559934.5,ENST00000559948.5,ENST00000560033.5,ENST00000560099.5,ENST00000560217.5	NO	PSMA4	NO	NO	YES	NO
18	890	rs58365910	78849034	rs58365910_C	0.9596(0.0391)	24.57	4.663e-133	132.331	CHRNA5-PSMA4	CHRNA5-PSMA4	chr15-78556692-T-C	78556692	PASS	38.31	0.289437	intergenic	PSMA4(dist=4275),CHRNA5(dist=8828)	ENST00000044462.11(dist=4273),ENST00000299565.9(dist=8828)	NO	PSMA4(dist=4280),CHRNA5(dist=8828)	NO	NO	NO	NO
18	891	rs72740955	78849779	rs72740955_T	0.9673(0.0389)	24.84	6.123e-136	135.213	CHRNA5-PSMA4	CHRNA5-PSMA4	chr15-78557437-C-T	78557437	PASS	34.53	0.245572	intergenic	PSMA4(dist=5020),CHRNA5(dist=8083)	ENST00000044462.11(dist=5018),ENST00000299565.9(dist=8083)	NO	PSMA4(dist=5025),CHRNA5(dist=8083)	NO	NO	NO	NO
18	893	rs2036527	78851615	rs2036527_A	0.9639(0.0389)	24.76	4.404e-135	134.356	CHRNA5-PSMA4	CHRNA5-PSMA4	chr15-78559273-G-A	78559273	PASS	40.21	0.276918	intergenic	PSMA4(dist=6856),CHRNA5(dist=6247)	ENST00000044462.11(dist=6854),ENST00000299565.9(dist=6247)	NO	PSMA4(dist=6861),CHRNA5(dist=6247)	NO	NO	NO	NO
18	894	rs55853698	78857939	rs55853698_G	0.9656(0.0388)	24.89	1.732e-136	135.761	CHRNA5	CHRNA5	chr15-78565597-T-G	78565597	PASS	40.72	0.23416	UTR5	CHRNA5(ENST00000299565.9:c.-123T>G,ENST00000559554.5:c.-123T>G)	ENST00000299565.9(ENST00000299565.9:c.-123T>G),ENST00000559554.5(ENST00000559554.5:c.-123T>G)	NO	CHRNA5(NM_000745:c.-123T>G,NM_001307945:c.-123T>G)	NO	NO	YES	NO
18	895	rs55781567	78857986	rs55781567_G	0.9589(0.0388)	24.72	1.322e-134	133.879	CHRNA5	CHRNA5	chr15-78565644-C-G	78565644	PASS	38.72	0.293777	UTR5	CHRNA5(ENST00000299565.9:c.-76C>G,ENST00000559554.5:c.-76C>G)	ENST00000299565.9(ENST00000299565.9:c.-76C>G),ENST00000559554.5(ENST00000559554.5:c.-76C>G)	NO	CHRNA5(NM_000745:c.-76C>G,NM_001307945:c.-76C>G)	NO	NO	YES	NO
18	897	rs11633958	78862064	rs11633958_T	0.9668(0.0391)	24.76	4.59e-135	134.338	CHRNA5	CHRNA5	chr15-78569722-C-T	78569722	PASS	40.74	0.225567	intronic	CHRNA5	ENST00000299565.9,ENST00000559554.5	NO	CHRNA5	NO	NO	NO	NO
18	898	rs7172118	78862453	rs7172118_A	0.9656(0.039)	24.74	8.166e-135	134.088	CHRNA5	CHRNA5	chr15-78570111-C-A	78570111	PASS	41.15	0.240579	intronic	CHRNA5	ENST00000299565.9,ENST00000559554.5	NO	CHRNA5	NO	NO	NO	NO
18	899	rs17486195	78865197	rs17486195_G	0.9628(0.0389)	24.73	9.815e-135	134.008	CHRNA5	CHRNA5	chr15-78572855-A-G	78572855	PASS	38.17	0.245277	intronic	CHRNA5	ENST00000299565.9,ENST00000559554.5	NO	CHRNA5	NO	NO	NO	NO
18	900	rs140330585	78866445	rs140330585_A	0.9617(0.0389)	24.7	1.828e-134	133.738	CHRNA5	CHRNA5	chr15-78574103-G-A	78574103	PASS	31.25	0.244903	intronic	CHRNA5	ENST00000299565.9,ENST00000559554.5	NO	CHRNA5	NO	NO	NO	NO
18	901	rs17486278	78867482	rs17486278_C	0.9548(0.0389)	24.54	1.057e-132	131.976	CHRNA5	CHRNA5	chr15-78575140-A-C	78575140	PASS	37.33	0.316976	intronic	CHRNA5	ENST00000299565.9,ENST00000559554.5	NO	CHRNA5	NO	NO	NO	NO
18	902	rs72740964	78868636	rs72740964_A	0.9601(0.039)	24.62	1.371e-133	132.863	CHRNA5	CHRNA5	chr15-78576294-G-A	78576294	PASS	36.79	0.225671	intronic	CHRNA5	ENST00000299565.9,ENST00000559554.5	NO	CHRNA5	NO	NO	NO	NO
18	903	rs7180002	78873993	rs7180002_T	0.9551(0.0389)	24.54	1.128e-132	131.948	CHRNA5	CHRNA5	chr15-78581651-A-T	78581651	PASS	40.43	0.24073	intronic	CHRNA5	ENST00000299565.9,ENST00000394802.4,ENST00000559554.5	NO	CHRNA5	NO	NO	NO	NO
18	904	rs56390833	78877381	rs56390833_A	0.9611(0.0389)	24.69	2.848e-134	133.545	CHRNA5	CHRNA5	chr15-78585039-C-A	78585039	PASS	37.89	0.240754	intronic	CHRNA5	ENST00000299565.9,ENST00000394802.4,ENST00000559554.5	NO	CHRNA5	NO	NO	NO	NO
18	905	rs951266	78878541	rs951266_A	0.9615(0.0389)	24.7	1.961e-134	133.708	CHRNA5	CHRNA5	chr15-78586199-G-A	78586199	PASS	38.5	0.241001	intronic	CHRNA5	ENST00000299565.9,ENST00000394802.4,ENST00000559554.5	NO	CHRNA5	NO	NO	NO	NO
18	906	rs16969968	78882925	rs16969968_A	0.9608(0.0389)	24.7	2.203e-134	133.657	CHRNA5	CHRNA5	chr15-78590583-G-A	78590583	PASS	38.81	0.225718	exonic	CHRNA5	ENST00000299565.9	NO	CHRNA5	NO	NO	NO	NO
18	907	rs8192482	78886198	rs8192482_T	0.9622(0.0389)	24.73	9.937e-135	134.003	CHRNA3-A5	CHRNA5	chr15-78593856-C-T	78593856	PASS	37.79	0.22579	UTR3	CHRNA5(ENST00000299565.9:c.*603C>T)	ENST00000559002.5	NO	CHRNA5(NM_000745:c.*603C>T,NM_001307945:c.*740C>T)	NO	NO	NO	NO
18	908	rs4887067	78886947	rs4887067_A	0.9624(0.0389)	24.74	8.198e-135	134.086	CHRNA3-A5	CHRNA5	chr15-78594605-G-A	78594605	PASS	39.09	0.226363	UTR3	CHRNA5(ENST00000299565.9:c.*1352G>A)	ENST00000559002.5	NO	CHRNA5(NM_000745:c.*1352G>A,NM_001307945:c.*1489G>A)	NO	NO	NO	NO
18	909	rs1051730	78894339	rs1051730_A	0.9647(0.0389)	24.81	1.433e-135	134.844	CHRNA3	CHRNA3	chr15-78601997-G-A	78601997	PASS	36.24	0.243932	exonic	CHRNA3	ENST00000326828.5,ENST00000348639.7,ENST00000559658.5	NO	CHRNA3	NO	NO	NO	NO
18	910	rs1317286	78896129	rs1317286_G	0.9625(0.0388)	24.78	2.88e-135	134.541	CHRNA3	CHRNA3	chr15-78603787-A-G	78603787	PASS	37.68	0.291101	intronic	CHRNA3	ENST00000558903.1	NO	CHRNA3	NO	NO	NO	NO
18	911	rs12914385	78898723	rs12914385_T	0.8932(0.0378)	23.66	1.438e-123	122.842	CHRNA3	CHRNA3	chr15-78606381-C-T	78606381	PASS	35.16	0.308438	intronic	CHRNA3	ENST00000388988.8,ENST00000408962.6,ENST00000566289.5,ENST00000566332.5	NO	CHRNA3	NO	NO	NO	NO
18	912	rs55676755	78898932	rs55676755_G	0.959(0.0389)	24.66	5.48e-134	133.261	CHRNA3	CHRNA3	chr15-78606590-C-G	78606590	PASS	39.3	0.257263	intronic	CHRNA3	ENST00000558903.1	NO	CHRNA3	NO	NO	NO	NO
18	913	rs56077333	78899003	rs56077333_A	0.9597(0.0393)	24.42	1.952e-131	130.71	CHRNA3	CHRNA3	chr15-78606661-C-A	78606661	PASS	38.17	0.277228	intronic	CHRNA3	ENST00000558903.1	NO	CHRNA3	NO	NO	NO	NO
18	915	rs112878080	78900647	rs112878080_G	0.953(0.039)	24.45	8.378e-132	131.077	CHRNA3	CHRNA3	chr15-78608305-A-G	78608305	PASS	39.45	0.281107	intronic	CHRNA3	ENST00000326828.5,ENST00000348639.7,ENST00000559658.5	NO	CHRNA3	NO	NO	NO	NO
18	916	rs111704647	78900650	rs111704647_T	0.9568(0.0389)	24.6	2.567e-133	132.591	CHRNA3	CHRNA3	chr15-78608308-C-T	78608308	PASS	39.4	0.281099	intronic	CHRNA3	ENST00000326828.5,ENST00000348639.7,ENST00000559658.5	NO	CHRNA3	NO	NO	NO	NO
18	917	rs138544659	78900701	rs138544659_G	0.9556(0.0389)	24.56	7.217e-133	132.142	CHRNA3	CHRNA3	chr15-78608359-T-G	78608359	PASS	37.62	0.281115	intronic	CHRNA3	ENST00000326828.5,ENST00000348639.7,ENST00000559658.5	NO	CHRNA3	NO	NO	NO	NO
18	918	rs147144681	78900908	rs147144681_T	0.9593(0.0389)	24.67	4.749e-134	133.323	CHRNA3	CHRNA3	chr15-78608566-C-T	78608566	PASS	38.87	0.260719	intronic	CHRNA3	ENST00000326828.5,ENST00000348639.7,ENST00000559658.5	NO	CHRNA3	NO	NO	NO	NO
18	919	rs113931022	78901113	rs113931022_T	0.9572(0.0389)	24.62	1.65e-133	132.783	CHRNA3	CHRNA3	chr15-78608771-C-T	78608771	PASS	39.15	0.281083	intronic	CHRNA3	ENST00000326828.5,ENST00000348639.7,ENST00000559658.5	NO	CHRNA3	NO	NO	NO	NO
18	920	rs146009840	78906177	rs146009840_T	0.961(0.0389)	24.69	2.388e-134	133.622	CHRNA3	CHRNA3	chr15-78613835-A-T	78613835	PASS	36.5	0.22575	intronic	CHRNA3	ENST00000326828.5,ENST00000348639.7,ENST00000559658.5	NO	CHRNA3	NO	NO	NO	NO
18	921	rs8040868	78911181	rs8040868_C	0.8921(0.0376)	23.75	1.891e-124	123.723	CHRNA3	CHRNA3	chr15-78618839-T-C	78618839	PASS	39.73	0.370469	exonic	CHRNA3	ENST00000326828.5,ENST00000348639.7,ENST00000559658.5	NO	CHRNA3	NO	NO	NO	NO
18	922	rs4243084	78911672	rs4243084_C	0.9506(0.0388)	24.53	1.441e-132	131.841	CHRNA3	CHRNA3	chr15-78619330-G-C	78619330	PASS	39.38	0.289548	intronic	CHRNA3	ENST00000559941.1,ENST00000561128.1	NO	CHRNA3	NO	NO	YES	NO
18	923	rs149959208	78912710	rs149959208_TGCGCGGGGCAGGGCGACGGGCA	0.9512(0.0389)	24.45	8.937e-132	131.049	CHRNA3	CHRNA3	chr15-78620368-T-TGCGCGGGGCAGGGCGACGGGCA	78620368	SVM;EXHET	41.31	0.199852	intronic	CHRNA3	ENST00000561128.1	NO	CHRNA3	NO	NO	YES	NO
18	924	rs8039449	78914534	rs8039449_T	0.8788(0.0383)	22.94	2.753e-116	115.56	CHRNA3-B4	CHRNA3	chr15-78622192-C-T	78622192	PASS	38.57	0.297703	upstream	CHRNA3	ENST00000348639.7	NO	CHRNA3(dist=1196),CHRNB4(dist=1919)	NO	NO	NO	NO
18	926	rs10851907	78915864	rs10851907_A	0.8321(0.0377)	22.09	5.739e-108	107.241	CHRNA3-B4	CHRNB4	chr15-78623522-G-A	78623522	PASS	39.22	0.385807	downstream	CHRNB4	ENST00000261751.7,ENST00000412074.6	NO	CHRNB4	NO	NO	NO	NO
18	927	rs55958997	78915872	rs55958997_A	0.8767(0.0385)	22.76	1.677e-114	113.775	CHRNA3-B4	CHRNB4	chr15-78623530-C-A	78623530	PASS	39.38	0.31156	downstream	CHRNB4	ENST00000261751.7,ENST00000412074.6	NO	CHRNB4	NO	NO	NO	NO
18	928	rs2869548	78922638	rs2869548_A	0.9034(0.0387)	23.34	3.289e-120	119.483	CHRNB4	CHRNB4	chr15-78630296-G-A	78630296	PASS	37.15	0.238405	intronic	CHRNB4	ENST00000261751.7,ENST00000412074.6,ENST00000559849.5	NO	CHRNB4	NO	NO	NO	NO
18	929	rs17487223	78923987	rs17487223_T	0.895(0.0387)	23.13	3.96e-118	117.402	CHRNB4	CHRNB4	chr15-78631645-C-T	78631645	PASS	38.28	0.254077	intronic	CHRNB4	ENST00000560511.5	NO	CHRNB4	NO	NO	NO	NO
18	930	rs72743158	78926445	rs72743158_C	0.8817(0.0386)	22.86	1.975e-115	114.704	CHRNB4	CHRNB4	chr15-78634103-T-C	78634103	PASS	38.59	0.245293	intronic	CHRNB4	ENST00000560511.5	NO	CHRNB4	NO	NO	NO	NO
18	931	rs67426328	78934318	rs67426328_G	0.7757(0.0382)	20.32	1.282e-91	90.8921	CHRNB4	CHRNB4	chr15-78641976-C-G	78641976	PASS	39.09	0.262073	intronic	CHRNB4	ENST00000560511.5	NO	CHRNB4	NO	NO	YES	NO
18	932	rs55988292	78936168	rs55988292_G	0.7733(0.0382)	20.25	5.059e-91	90.2959	CHRNB4	CHRNB4	chr15-78643826-A-G	78643826	PASS	37.36	0.281728	intronic	CHRNB4	ENST00000560511.5	NO	CHRNB4(dist=2616),LOC646938(dist=108211)	NO	NO	NO	NO
SNPs not found in FAVOR
18	862	rs750136148	78734588	rs750136148_A	0.9626(0.039)	24.71	1.651e-134	133.782	NoInfo	NoInfo
18	882	15:78804071_TA_T	78804071	X15.78804071_TA_T_TA	0.9349(0.0395)	23.66	1.797e-123	122.745	NoInfo	NoInfo
18	892	15:78850501_AT_A	78850501	X15.78850501_AT_A_A	0.9682(0.0393)	24.62	1.523e-133	132.817	NoInfo	NoInfo
18	896	rs752882796	78859605	rs752882796_A	0.9585(0.0389)	24.64	9.072e-134	133.042	CHRNA5	CHRNA5
18	914	rs773481272	78899560	rs773481272_C	0.8653(0.0391)	22.11	3.766e-108	107.424	NoInfo	NoInfo
18	925	rs768691045	78915370	rs768691045_C	0.8783(0.0378)	23.21	5.564e-119	118.255	NoInfo	NoInfo
Footnotes:
Gene(NCBI, GWAScatalog): the gene obtained from the National Center for Biotechnology Information (NCBI) site and the The NHGRI-EBI Catalog of human genome-wide association studies (GWAS Catalog) site.
Gene(Combine NCBI, GWAScatalog, FAVOR): the integrated gene information from different SNP annotation tools such as NCBI, GWAS and FAVOR.
FAVOR: annotation data from the Functional Annotation of Variant–Online Resource (FAVOR) site.
